# Supplementary material for: Microflora Disturbance during Progression of Glucose Intolerance and Effect of Sitagliptin: An Animal Study
Source: J Diabetes Res. 2016 Aug 18;2016:2093171. doi: 10.1155/2016/2093171 (PMC5007364; doi:10.1155/2016/2093171)
Supplement: Supplementary file 1 — Figure S1 Process of animal experiment: The SD rats were induced IGT and T2DM by high-fat-high-sugar chow and low dose streptozocin injection. Diabetic rats were then treated with sitagliptin. Feces were collected at four points in the process, representing normal control, obesity, diabetes and sitagliptin-treated condition respectively. [file 2093171.f1.zip]

Archive with 7 entries (7 files):
- Fig.S1-flow chart.docx
- Fig.S2-Rarefaction Curve.docx
- Fig.S3-Shannon Curve.docx
- Fig.S4-heatmap.docx
- Fig.S5 lefse_LDA.docx
- XinfengYan_Table S1.xls
- XinfengYan_Table S2.xls
