# Supplementary material for: Microflora Disturbance during Progression of Glucose Intolerance and Effect of Sitagliptin: An Animal Study
Source: J Diabetes Res. 2016 Aug 18;2016:2093171. doi: 10.1155/2016/2093171 (PMC5007364; doi:10.1155/2016/2093171)
Supplement: Supplementary file 1 — Figure S1 Process of animal experiment: The SD rats were induced IGT and T2DM by high-fat-high-sugar chow and low dose streptozocin injection. Diabetic rats were then treated with sitagliptin. Feces were collected at four points in the process, representing normal control, obesity, diabetes and sitagliptin-treated condition respectively. [file 2093171.f1.zip › XinfengYan_Table S1.xls]

## Sheet: Sheet1
Group	Normal Control										Obesity										Diabetes										Sitagliptin
Sample ID	NC1	NC2	NC3	NC4	NC5	NC6	NC7	NC8	NC9	NC10	Obe1	Obe2	Obe3	Obe4	Obe5	Obe6	Obe7	Obe8	Obe9	Obe10	DM1	DM2	DM3	DM4	DM5	DM6	DM7	DM8	DM9	DM10	Sit1	Sit2	Sit3	Sit4	Sit5	Sit6	Sit7	Sit8	Sit9	Sit10
Sequences	8209	6902	6163	6885	6952	6618	5549	2048	6746	6506	6538	6484	5019	4977	6864	6606	6212	6484	6619	6644	7400	7435	5884	5439	5474	6156	6361	6512	7241	6102	5653	5354	5403	4580	5634	5259	5859	5744	5826	3538
OTU	486	475	310	459	318	447	371	242	408	282	452	382	327	299	457	379	427	362	499	444	267	337	338	254	293	316	369	305	295	259	351	417	411	415	441	407	502	467	468	341
ace	749	615	406	561	519	705	523	470	694	377	635	540	480	464	568	505	736	513	616	606	385	614	464	336	379	427	517	407	411	330	478	569	527	574	557	554	645	628	587	513
chao	647	631	390	561	446	621	535	339	586	365	602	558	498	459	550	551	625	520	629	575	394	486	420	357	385	479	548	394	396	359	478	609	523	580	554	576	669	650	577	532
shannon	4.64	4.78	4.15	4.82	4.04	4.87	4.34	4.3	4.4	4.03	4.59	4.24	4.14	3.78	4.52	4.22	4.44	3.95	5.07	4.25	3.67	3.66	3.79	4	4.25	4.33	3.89	4.15	3.88	4.26	4.36	4.62	4.54	4.55	4.69	4.58	5.03	4.75	4.91	4.47
simpson	0.0246	0.0258	0.0306	0.0206	0.0372	0.0186	0.0285	0.0255	0.0272	0.041	0.0288	0.0471	0.0433	0.061	0.0286	0.0568	0.0301	0.0512	0.0141	0.0525	0.0613	0.0792	0.0868	0.0416	0.0312	0.0267	0.0683	0.0365	0.0526	0.0251	0.0338	0.025	0.0307	0.029	0.0282	0.0282	0.016	0.0207	0.018	0.0284
