# Supplementary material for: Microflora Disturbance during Progression of Glucose Intolerance and Effect of Sitagliptin: An Animal Study
Source: J Diabetes Res. 2016 Aug 18;2016:2093171. doi: 10.1155/2016/2093171 (PMC5007364; doi:10.1155/2016/2093171)
Supplement: Supplementary file 1 — Figure S1 Process of animal experiment: The SD rats were induced IGT and T2DM by high-fat-high-sugar chow and low dose streptozocin injection. Diabetic rats were then treated with sitagliptin. Feces were collected at four points in the process, representing normal control, obesity, diabetes and sitagliptin-treated condition respectively. [file 2093171.f1.zip › XinfengYan_Table S2.xls]

## Sheet: Sheet1
phylum	class	order	family	genus	Normal(%)	Obesity(%)	Diabetes(%)	Sitagliptin(%)	P#	P*	P∆
Bacteroidetes	Bacteroidia	Bacteroidales	Bacteroidaceae	Bacteroides	1.4	0.2	0.6	5.4	0.013	0.022	0.005
			Rikenellaceae	Alistipes	1.1	0.1	0.1	0.5	0.005		0.005
			S24-7	S24-7norank	17.3	9.6	8.2	15.3	0.013
			Porphyromonadaceae	Parabacteroides	0.2	0.02	0.1	0.6	0.008	0.024	0.005
			ratAN060301C	ratAN060301C_norank	1.3	0.3	0.3	1.1	0.017		0.005
			Prevotellaceae	Prevotella	1.7	0.9	4.6	6.5		0.005
Firmicutes	Erysipelotrichia	Erysipelotrichales	Erysipelotrichaceae	Allobaculum	0.9	1.3	8	12.1		0.028
				Coprobacillus	0.1	0.1	0.6	0		0.037	0.005
				Turicibacter	1.6	4.2	1.9	0.35	0.005		0.013
	Clostridia	Clostridiales	Lachnospiraceae	Blautia	0.2	0.8	7.1	0.3	0.012	0.005	0.005
				Coprococcus	0.2	0.2	1.3	1.3		0.009
				Roseburia	0.7	0.9	0.3	0.5		0.042
			Ruminococcaceae	Anaerotruncus	1.3	0.5	0.4	0.5	0.037
				Ruminococcus	2.5	1.4	0.6	1.9		0.025	0.007
				Oscillibacter	0.2	0.4	0.027	2		0.021	0.005
			Clostridiaceae	Clostridium	1.3	4.6	0.8	0.7	0.014	0.013
	Bacilli	Bacillales	Bacillaceae	Bacillus	4.6	4.4	6	0			0.005
		Lactobacillales	Lactobacillaceae	Lactobacillus	22.3	22.5	13	6.7			0.028
		Lactobacillales	Streptococcaceae	Lactococcus	0.4	0.3	0.6	0.02			0.005
Proteobacteria	Betaproteobacteria	Burkholderiales	Alcaligenaceae	Parasutterella	0.3	0.02	0.098	0.7	0.033	0.016	0.018
Actinobacteria	Actinobacteria	Bifidobacteriales	Bifidobacteriaceae	Bifidobacterium	0.024	0.005	0.002	0.085			0.007
Tenericutes	Mollicutes	RF9	RF9	RF9_norank	0.6	1.2	0.09	0.96		0.005	0.005
Differences among groups at genus level (P# group Obesity vs Lean; P* group Diabetes vs Obesity; P∆ group Diabetes vs Sitagliptin).
